# Supplementary material for: Helical surface magnetization in nanowires: the role of chirality
Source: Royal Society of Chemistry journal article supplement (doi:10.1039/d0nr05424k), 2020-01-01
Supplement: d0nr05424k1.pdf [file d0nr05424k1.pdf]

## Supplementary Information for: Helical surface magnetization in nanowires: the role of chirality

Sandra Ruiz-Gómez,<sup>\*a,b</sup> Claudia Fernández-González,<sup>c</sup> Eduardo Martínez,<sup>d</sup> Víctor Raposo,<sup>d</sup> Andrea Sorrentino,<sup>b</sup> Michael Foerster,<sup>b</sup> Lucía Aballe,<sup>b</sup> Arantazu Mascaraque,<sup>a</sup> Salvador Ferrer,<sup>b</sup> and Lucas Pérez<sup>a,c</sup>

### Structure of the nanowires measured by Transmission Electron Microscopy

Figure S.1 shows a TEM image, in Z-contrast mode, of one NW with chemical barriers approximately 20 nm wide, separated 250 nm from each other. The composition profiles along different NWs measured by energy dispersive X-ray spectroscopy (EDX), show sharp changes in the Fe/Ni ratio at the chemical barriers. The composition change from Fe<sub>30</sub>Ni<sub>70</sub> to Fe<sub>80</sub>Ni<sub>20</sub>.

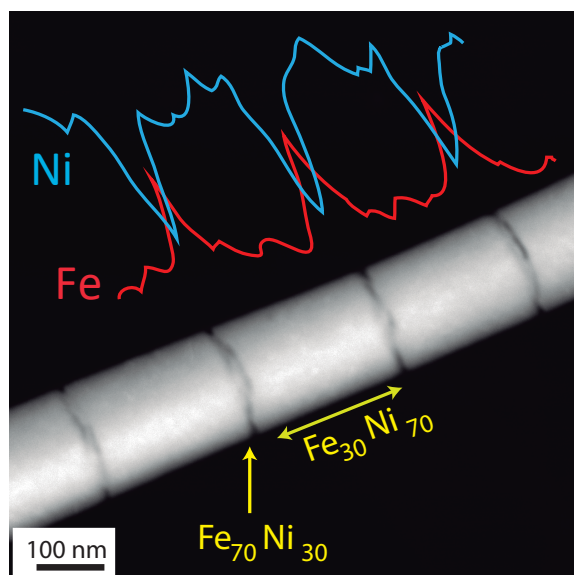

**Fig. S.1** TEM image of a individual NW together with the relative Ni and Fe content, measured by energy dispersive x-ray spectroscopy.

### Photoemission Electron Microscopy (PEEM)

Figure S.2 shows the chemical and magnetic contrast images of one permalloy nanowire with chemical barriers separated 250 nm. Images are taken with the X-ray beam per-

pendicular to the nanowire. From the magnetic contrast image, Figure S.2.b, it is clear that the magnetic structure consist in a core/shell structure, with the magnetization in the outer part of the NW in the azimuthal direction and axial magnetization in the inner part of the NW. However, due to the proximity of the chemical barriers, it is difficult to correlate chemical barriers and DWs due to the spatial resolution in these images.

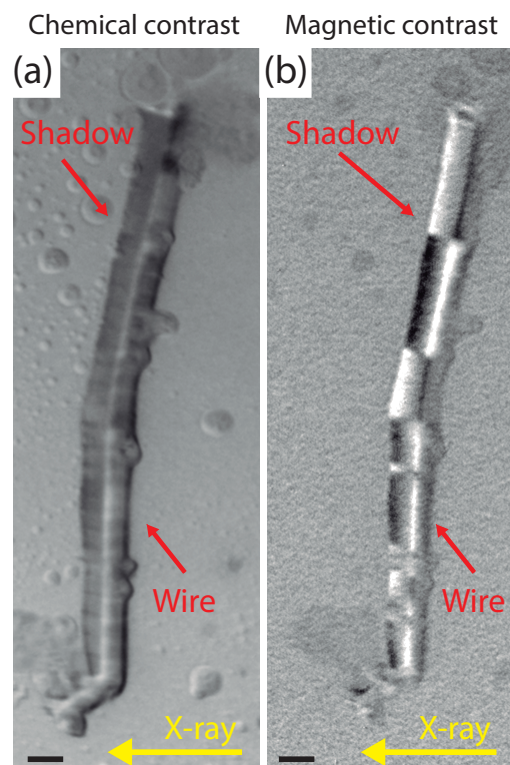

**Fig. S.2** PEEM images of an individual NW. (a) Chemical contrast, taken as the difference in X-ray absorption at the Fe L<sub>3</sub> and Ni L<sub>3</sub> absorption edges and (b) XMCD image taken as the pixel by pixel difference of two images taken at Fe-edge with opposite photon helicity. The scale bar is 500 nm

<sup>a</sup> Dept. Física de Materiales. Universidad Complutense de Madrid. 28040 Madrid, Spain. E-mail: srgomez@ucm.es

<sup>b</sup> ALBA Synchrotron, 08290 Cerdanyola del Vallès, Spain

<sup>c</sup> IMDEA Nanoscience, Madrid, Spain

<sup>d</sup> Dept. de Física Aplicada. Universidad de Salamanca, 37008 Salamanca, Spain
